# Supplementary material for: Plasma Metabolome Profiling Identifies Metabolic Subtypes of Pancreatic Ductal Adenocarcinoma
Source: MDPI journal article supplement (doi:10.3390/cells10071821), 2021-07-19
Supplement: s1 [file s1]

**Supplementary Table S1:** Demographics and distribution of clinical characterization according to project phases.

|                                 | ID (N=80)   | VD1 (N=79)  | VD2 (N=202) | Total (N=361) |
|---------------------------------|-------------|-------------|-------------|---------------|
| <b>Center</b>                   |             |             |             |               |
| Berlin-Mitte                    | 0 (0.0%)    | 0 (0.0%)    | 2 (1.0%)    | 2 (0.6%)      |
| Berlin-Virchow                  | 0 (0.0%)    | 0 (0.0%)    | 62 (30.7%)  | 62 (17.2%)    |
| Bochum                          | 0 (0.0%)    | 0 (0.0%)    | 64 (31.7%)  | 64 (17.7%)    |
| Dresden                         | 80 (100.0%) | 79 (100.0%) | 74 (36.6%)  | 233 (64.5%)   |
| <b>Gender</b>                   |             |             |             |               |
| female                          | 34 (42.5%)  | 42 (53.2%)  | 89 (44.1%)  | 165 (45.7%)   |
| male                            | 46 (57.5%)  | 37 (46.8%)  | 113 (55.9%) | 196 (54.3%)   |
| <b>UICC classification</b>      |             |             |             |               |
| IA                              | 0 (0.0%)    | 1 (1.3%)    | 4 (2.0%)    | 5 (1.4%)      |
| IB                              | 2 (2.5%)    | 0 (0.0%)    | 2 (1.0%)    | 4 (1.1%)      |
| IIA                             | 16 (20.0%)  | 11 (13.9%)  | 33 (16.4%)  | 60 (16.7%)    |
| IIB                             | 37 (46.2%)  | 28 (35.4%)  | 64 (31.8%)  | 129 (35.8%)   |
| III                             | 19 (23.8%)  | 26 (32.9%)  | 30 (14.9%)  | 75 (20.8%)    |
| IV                              | 6 (7.5%)    | 13 (16.5%)  | 68 (33.8%)  | 87 (24.2%)    |
| <b>Age</b>                      |             |             |             |               |
| Mean (SD)                       | 68.6 (7.3)  | 67.6 (9.4)  | 66.9 (9.6)  | 67.4 (9.1)    |
| <b>Diabetic status</b>          |             |             |             |               |
| No                              | 40 (50.0%)  | 43 (54.4%)  | 140 (69.3%) | 223 (61.8%)   |
| Yes                             | 40 (50.0%)  | 36 (45.6%)  | 62 (30.7%)  | 138 (38.2%)   |
| <b>BMI</b>                      |             |             |             |               |
| Mean (SD)                       | 24.7 (3.1)  | 25.5 (4.2)  | 24.6 (3.9)  | 24.8 (3.8)    |
| <b>Tumor size (pT)</b>          |             |             |             |               |
| 1                               | 0 (0.0%)    | 0           | 6 (3.0%)    | 6 (2.3%)      |
| 2                               | 4 (6.6%)    | 0           | 5 (2.5%)    | 9 (3.5%)      |
| 3                               | 57 (93.4%)  | 0           | 99 (50.0%)  | 156 (60.2%)   |
| 4                               | 0 (0.0%)    | 0           | 10 (5.1%)   | 10 (3.9%)     |
| Inoperable                      | 0 (0.0%)    | 0           | 78 (39.4%)  | 78 (30.1%)    |
| <b>Lymph node Invasion (pN)</b> |             |             |             |               |
| 0                               | 19 (31.1%)  | 0           | 44 (31.0%)  | 63 (31.0%)    |
| 1                               | 42 (68.9%)  | 0           | 77 (54.2%)  | 119 (58.6%)   |
| Not assessable                  | 0 (0.0%)    | 0           | 21 (14.8%)  | 21 (10.3%)    |
| <b>Metastases (pM)</b>          |             |             |             |               |
| 0                               | 55 (90.2%)  | 0           | 125 (62.8%) | 180 (69.2%)   |
| 1                               | 4 (6.6%)    | 0           | 67 (33.7%)  | 71 (27.3%)    |
| Not assessable                  | 2 (3.3%)    | 0           | 7 (3.5%)    | 9 (3.5%)      |
| <b>Tumor Grade</b>              |             |             |             |               |
| 1                               | 0 (0.0%)    | 0           | 6 (3.2%)    | 6 (2.5%)      |
| 2                               | 28 (54.9%)  | 0           | 69 (36.3%)  | 97 (40.2%)    |
| 3                               | 23 (45.1%)  | 0           | 69 (36.3%)  | 92 (38.2%)    |
| 4                               | 0 (0.0%)    | 0           | 3 (1.6%)    | 3 (1.2%)      |
| Not assessable                  | 0 (0.0%)    | 0           | 43 (22.6%)  | 43 (17.8%)    |
| <b>CA 19.9 levels (U/ml)</b>    |             |             |             |               |
| ≤37                             | 17 (21.2%)  | 20 (25.3%)  | 58 (28.7%)  | 95 (26.3%)    |
| >37                             | 63 (78.8%)  | 59 (74.7%)  | 144 (71.3%) | 266 (73.7%)   |
